# Supplementary material for: A Historical Cohort in Kidney Transplantation: 55-Year Follow-Up of 72 HLA-Identical, Donor-Recipient Pairs
Source: MDPI journal article supplement (doi:10.3390/jcm10235505), 2021-11-24
Supplement: s1 [file s1]

**Supplemental Table S1: UNOS Cohort Descriptions**

|                                    | <b>Historic UNOS<br/>Cohort<br/>N=18,287</b> | <b>Modern UNOS<br/>Cohort<br/>N=76,956</b> | <b>p-value</b> |
|------------------------------------|----------------------------------------------|--------------------------------------------|----------------|
| <b>Gender (Female)-n(%)</b>        | 7,539 (41%)                                  | 29,276 (38%)                               | <0.001         |
| <b>Age-Med(IQR)</b>                | 43.0 (32.0-53.0)                             | 50.0 (38.0-59.0)                           | <0.001         |
| <b>Race/Ethnicity-n(%)</b>         |                                              |                                            | <0.001         |
| White                              | 11,942 (65%)                                 | 49,279 (64%)                               |                |
| Black                              | 3,072 (17%)                                  | 11,087 (14%)                               |                |
| Hispanic                           | 2,208 (12%)                                  | 11,509 (15%)                               |                |
| Asian                              | 712 ( 4%)                                    | 3,865 ( 5%)                                |                |
| Native American                    | 154 ( 1%)                                    | 477 ( 1%)                                  |                |
| Native Hawaiian                    | 87 ( 0%)                                     | 243 ( 0%)                                  |                |
| Multiracial                        | 110 ( 1%)                                    | 496 ( 1%)                                  |                |
| Unknown                            | 2 ( 0%)                                      | 0 ( 0%)                                    |                |
| <b>Dialysis Time(mos)-Med(IQR)</b> | 14 (8-25)                                    | 16 (8-29)                                  | <0.001         |
| <b>On Dialysis?-n(%)</b>           | 14,490 (81.9%)*                              | 51,018 (66.3%)*                            | <0.001         |
| <b>BMI-Med(IQR)</b>                | 24.9 (22.0-28.4)^                            | 27.3 (23.7-31.4)*                          | <0.001         |
| <b>Diagnosis-n(%)</b>              |                                              |                                            | <0.001         |
| Cystic/Congenital                  | 1,553 (11%)&                                 | 11,478 (15%)*                              |                |
| Diabetic Nephropathy               | 3,374 (23%)&                                 | 17,495 (23%)*                              |                |
| Glomerulonephritis                 | 4,609 (31%)&                                 | 21,851 (29%)*                              |                |
| Hypertension                       | 2,279 (15%)&                                 | 13,146 (17%)*                              |                |
| Obstructive Uropathy               | 581 ( 4%)&                                   | 2,121 ( 3%)*                               |                |
| Other                              | 2,348 (16%)&                                 | 10,540 (14%)*                              |                |

\* <5% missing; ^ 5-10% missing; & 10-20% missing
